# Supplementary material for: Myelinating Schwann cells ensheath multiple axons in the absence of E3 ligase component Fbxw7
Source: PubMed Central journal article supplement (PMC6611888; doi:10.1038/s41467-019-10881-y), 2019-07-05
Supplement: 41467_2019_10881_MOESM1_ESM.pdf [file 41467_2019_10881_MOESM1_ESM.pdf]

**Supplementary Information for:**

Myelinating Schwann cells ensheath multiple axons in the absence of E3 ligase component Fbxw7

Harty et al.

# SUPPLEMENTARY FIGURE 1

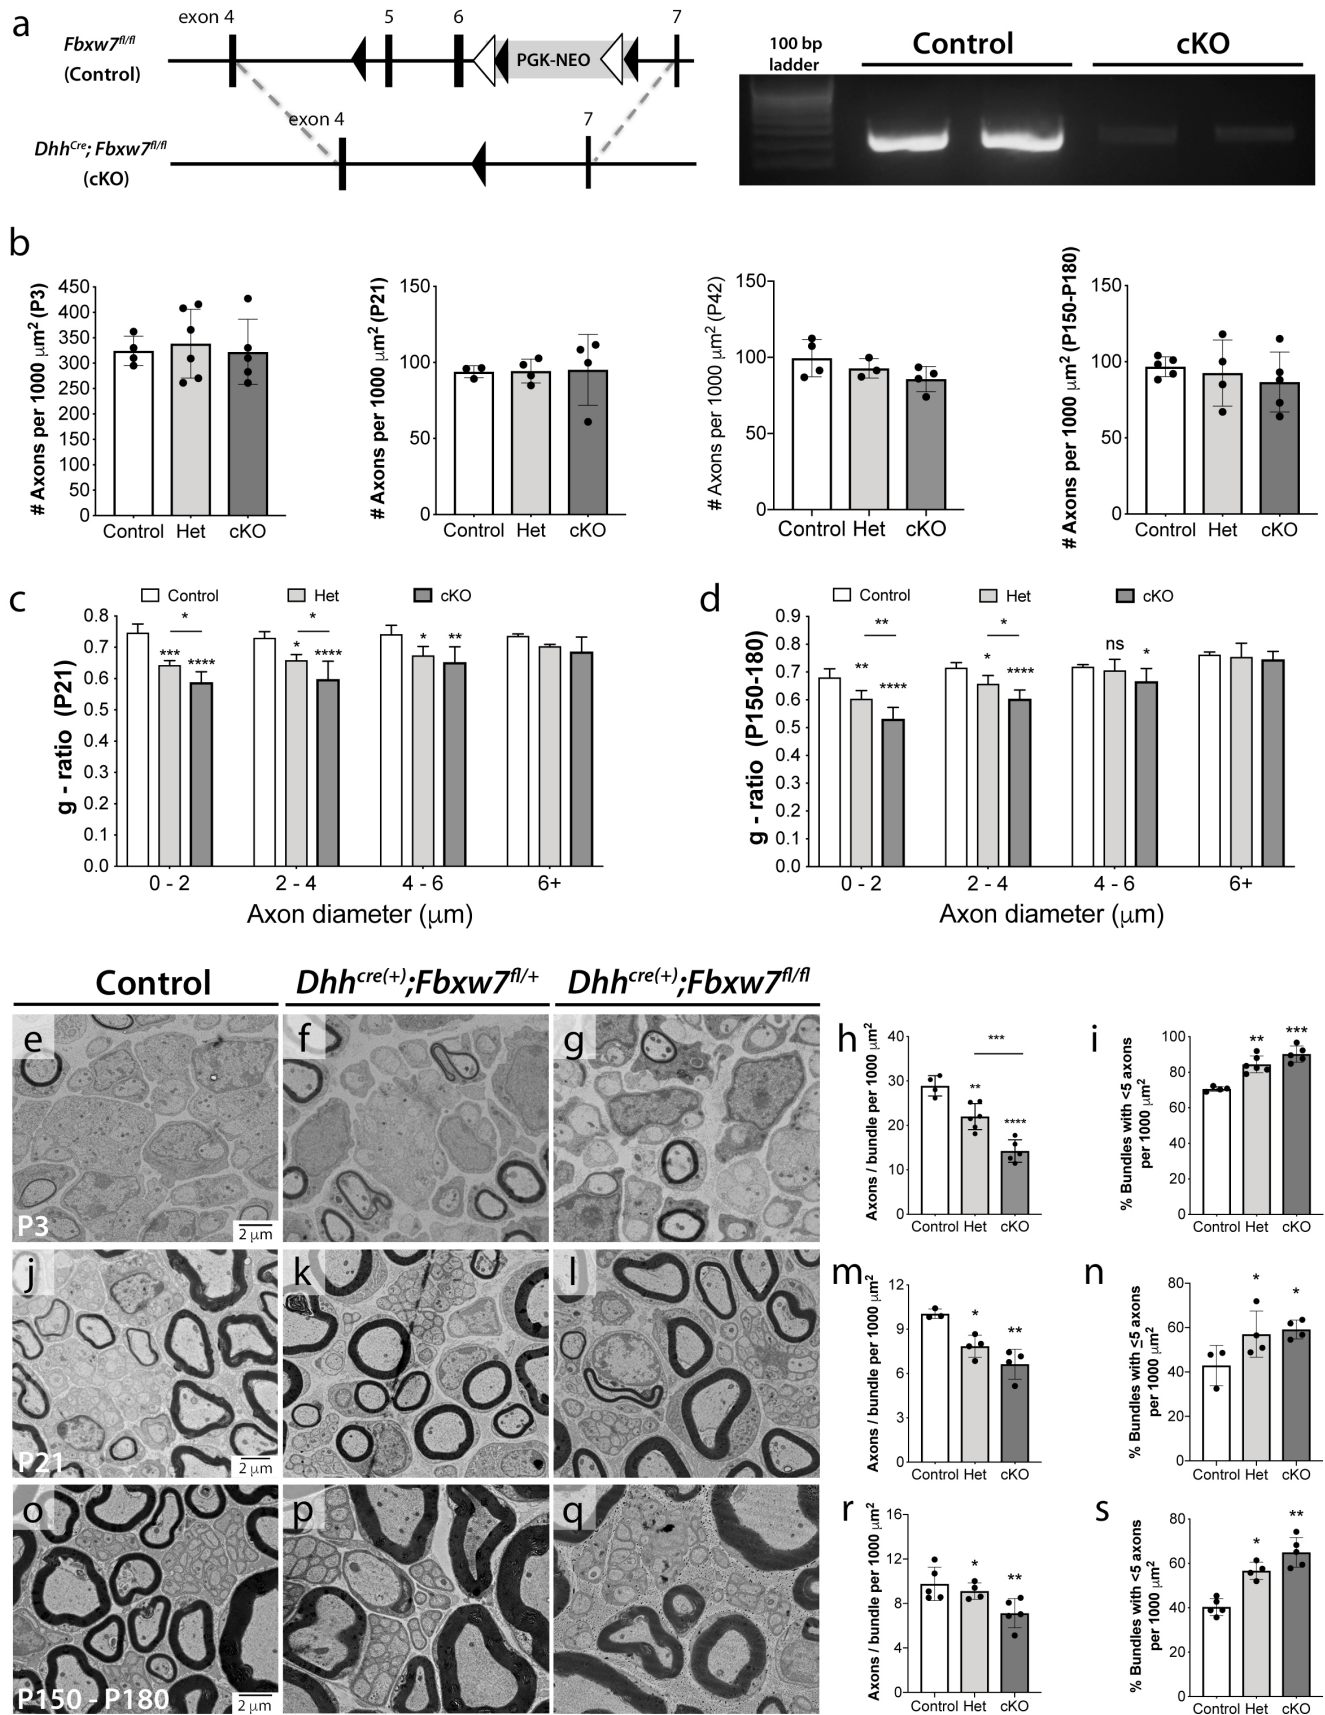

**Supplementary Figure 1: Fbxw7 cell-autonomously regulates SC radial sorting and Remak bundle ensheathment.** (a) Exons 5 and 6 are targeted in *Fbxw7* in *Dhh<sup>cre(+)</sup>;Fbxw7<sup>fl/fl</sup>* animals. RT-PCR shows that *Fbxw7* mRNA is significantly reduced in sciatic nerves of *Dhh<sup>cre(+)</sup>;Fbxw7<sup>fl/fl</sup>* (cKO) compared to *Dhh<sup>cre(-)</sup>;Fbxw7<sup>fl/fl</sup>* (control) at P21. (b) Total axon number is not statistically different across genotypes at every stage assessed ( $p > 0.05$  for all comparisons). (c-d) Myelin thickness is increased, particularly on small axons, in *Fbxw7* mutant nerves beginning at P21 (c; 0-2  $\mu\text{m}$ : Control to Het  $p = 0.0004$ , Control to cKO  $p < 0.0001$ , Het to cKO  $p = 0.0355$ ; 2-4  $\mu\text{m}$ : Control to Het  $p = 0.0149$ , Control to cKO  $p < 0.0001$ , Het to cKO  $p = 0.0183$ ; 4-6  $\mu\text{m}$ : Control to Het  $p = 0.0227$ , Control to cKO  $p = 0.0020$ , Het to cKO  $p = 0.5585$ ; two way ANOVA) and persisting until at least P180 (d; 0-2  $\mu\text{m}$ : Control to Het  $p = 0.0023$ , Control to cKO  $p < 0.0001$ , Het to cKO  $p = 0.0045$ ; 2-4  $\mu\text{m}$ : Control to Het  $p = 0.0262$ , Control to cKO  $p < 0.0001$ , Het to cKO  $p = 0.0398$ ; 4-6  $\mu\text{m}$ : Control to Het  $p = 0.8195$ , Control to cKO  $p = 0.0344$ , Het to cKO  $p = 0.1704$ ; two way ANOVA). (e-i) TEM at P3 shows that loss of *Fbxw7* increases segregation of axons during radial sorting (axons/bundle: h; Control to Het  $p = 0.0042$ , Control to cKO  $p < 0.0001$ , Het to cKO  $p = 0.0011$ ; one way ANOVA), (percentage of bundles with  $\leq 5$  axons: i; Control to Het  $p = 0.0053$ , Control to cKO  $p = 0.0005$ , Het to cKO  $p = 0.2628$ ; one way ANOVA). This phenotype persists at P21 (j-n; m: Control to Het  $p = 0.0321$ , Control to cKO  $p = 0.0034$ , Het to cKO  $p = 0.2369$ ; n: Control to Het  $p = 0.0412$ , Control to cKO  $p = 0.0462$ , Het to cKO  $p = 0.9889$ ; one way ANOVA) through at least 6 months of age (P150-P180; o-s; r: Control to Het  $p = 0.0280$ , Control to cKO  $p = 0.0019$ , Het to cKO  $p = 0.3909$ ; s: Control to Het  $p = 0.0363$ , Control to cKO  $p = 0.0010$ , Het to cKO  $p = 0.1821$ ; one way ANOVA). ns=not significant. Asterisks above bars indicate comparisons to controls. Unless otherwise indicated, comparisons between *Dhh<sup>cre(+)</sup>;Fbxw7<sup>fl/+</sup>* and *Dhh<sup>cre(+)</sup>;Fbxw7<sup>fl/fl</sup>* were not significant. P3: N=4 control, 6 heterozygous, 5 cKO. P21: N=3 control, 4 heterozygous, 4 cKO. P150-180: N=5 control, 4 heterozygous, 5 cKO. Error bars depict SD.

# SUPPLEMENTARY FIGURE 2

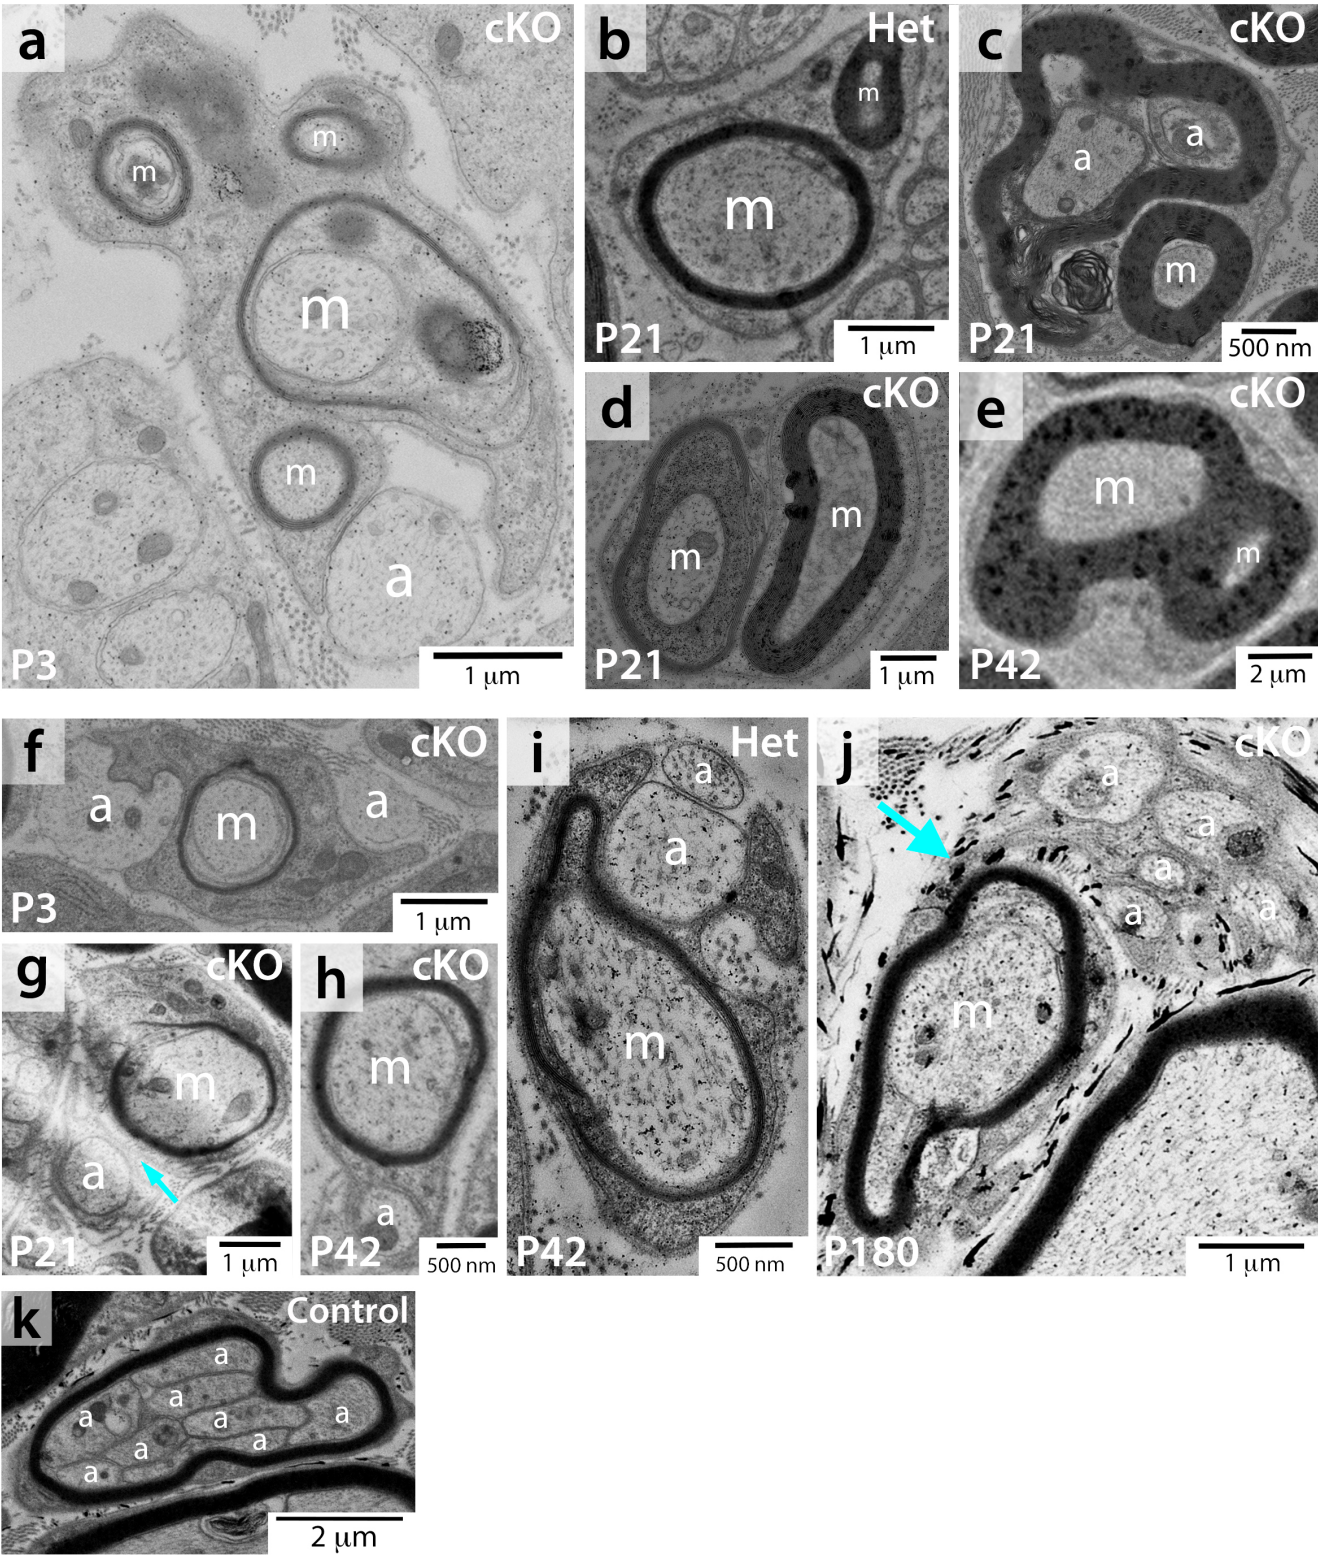

**Supplementary Figure 2: Enhanced myelinating potential in *Fbxw7* mutant SCs.** Additional examples of apparent multi-axonal ensheathment by myelinating SCs in Het and cKO animals at each time point – P3 (a, f), P21 (b-d, g), P42 (e, h, i) and P150-180 (j). *Fbxw7* mutant SCs were occasionally seen appearing to myelinate as many as four independent axons (a; myelinated axons indicated by m; unmyelinated axons indicated by a). (a, f-j) Additional examples of SCs that appear to have both myelinated larger axons as well as encompassed several non-myelinated axons like myelinating/Remak SC hybrids – P3 (a, f), P21 (g), P42 (e, h, i) and P150-180 (j). Here again, the myelinated axon and the bundle of unmyelinated axons were sometimes linked by thin processes of SC cytoplasm (g, j; blue arrows). These phenotypes are distinct from polyaxonal myelination in which a bundle of small-diameter axons is myelinated as though the bundle were a single large axon (k).

# SUPPLEMENTARY FIGURE 3

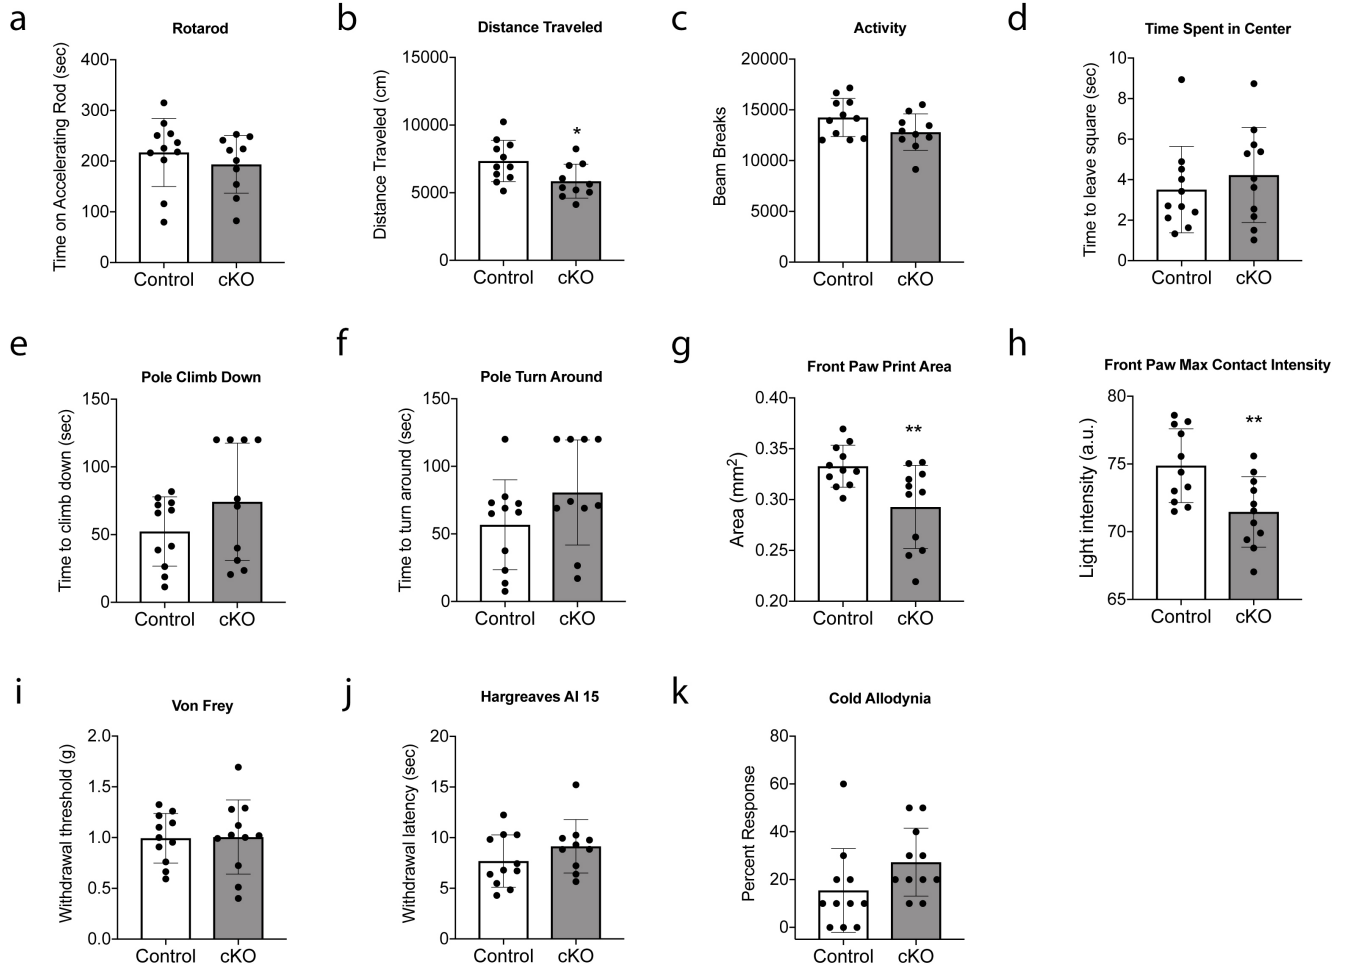

**Supplementary Figure 3: Loss of *Fbxw7* causes mild motor and sensory deficits.** A battery of sensory and motor tests (a-k) showed that at 5-6 months, loss of *Fbxw7* results in mild behavioral changes. Motor tests included: accelerating rotarod (a), open field (b,c; b – p=0.0253), movement initiation (d), the pole test (e,f) and gait analyses (g,h; g – p=0.0091; h – p=0.0070). Mice were also tested for sensitivity to mechanical stimuli (i), heat (j), and cold (k). Unpaired *t*-test with Welch's correction, N = 11 controls, N = 10 cKO (conditional knockout). Unless otherwise indicated the comparison is not significant (p>0.05). AI, active intensity. Error bars are SD.

# SUPPLEMENTARY FIGURE 4

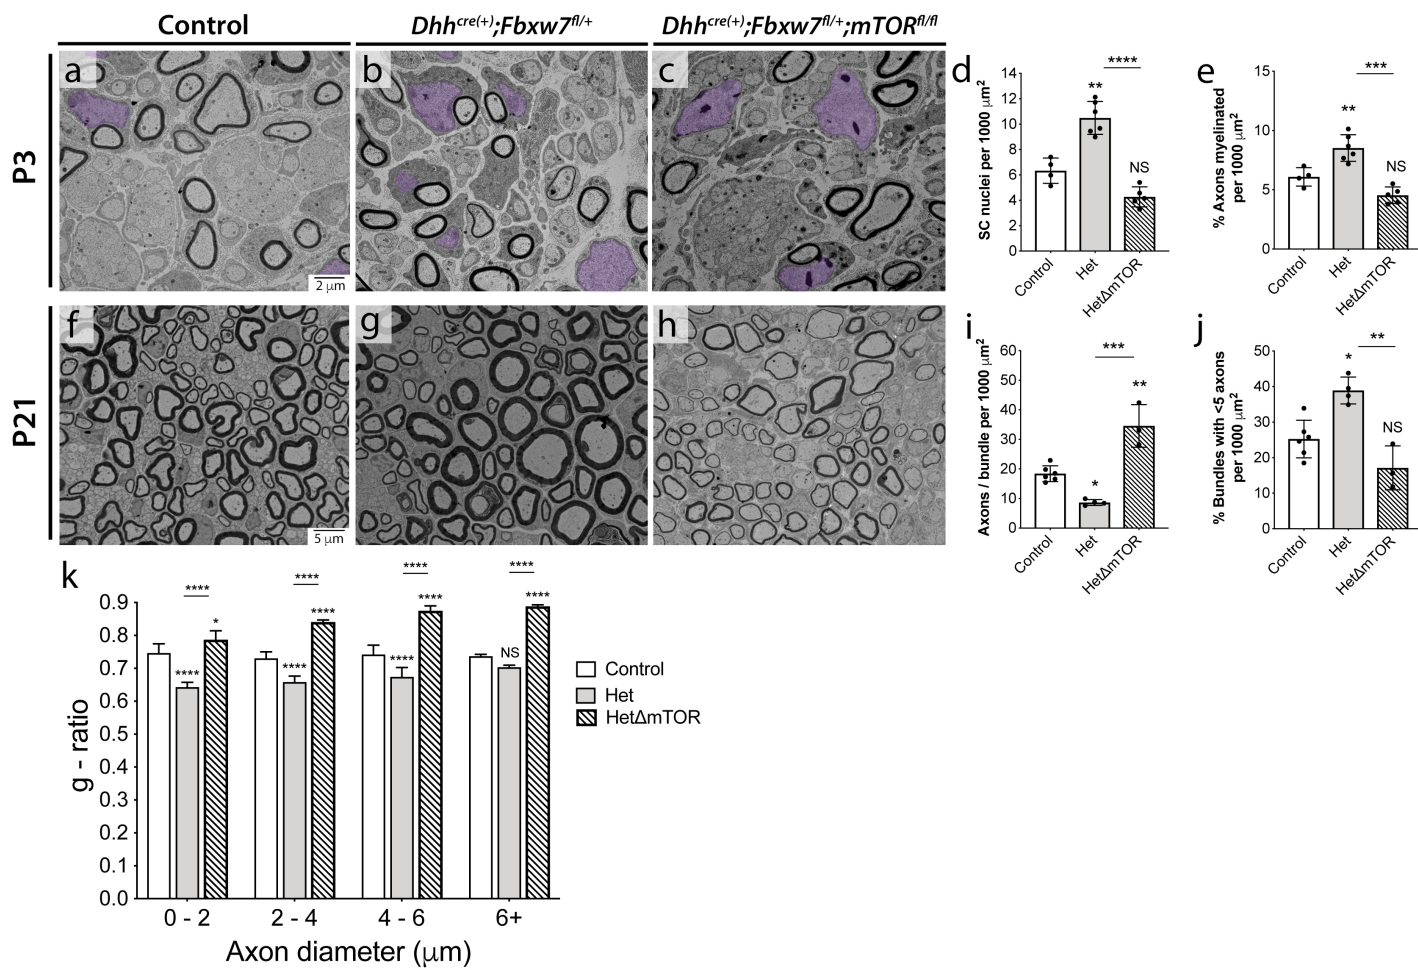



**Supplementary Figure 4: Genetic inhibition of mTOR suppresses the SC number, radial sorting, and myelin thickness phenotypes seen in *Fbxw7* mutant nerves.** (a-j) Transmission electron micrographs (TEMs) of SC-specific double mutant *Fbxw7:mTOR* mice at P3 (a-e) and P21 (f-j) demonstrates that *Dhh<sup>cre(+)</sup>;Fbxw7<sup>fl/+</sup>;mTOR<sup>+/+</sup>* (b; Het [heterozygous]) nerves display greater numbers of SC nuclei as well as a higher percentage of myelinated axons relative to controls (a). Loss of mTOR in *Dhh<sup>cre(+)</sup>;Fbxw7<sup>fl/+</sup>;mTOR<sup>fl/fl</sup>* (HetΔmTOR; c) nerves suppresses both of these phenotypes (d,e; d - Control to Het p=0.0020, Control to HetΔmTOR p=0.1232, Het to HetΔmTOR p<0.0001; e - Control to Het p=0.0037, Control to HetΔmTOR p=0.0643, Het to HetΔmTOR p<0.0001; one way ANOVA). Deletion of *mTOR* further suppressed the radial sorting and Remak SC ensheathment defects observed in *Dhh<sup>cre(+)</sup>;Fbxw7<sup>fl/+</sup>;mTOR<sup>+/+</sup>* nerves (f-j; i - Control to Het p=0.0360, Control to HetΔmTOR p=0.0033, Het to HetΔmTOR p=0.0002; j - Control to Het p=0.0317, Control to HetΔmTOR p=0.1752, Het to HetΔmTOR p=0.0037; one way ANOVA). *Dhh<sup>cre(+)</sup>;Fbxw7<sup>fl/+</sup>;mTOR<sup>fl/fl</sup>* sciatic nerves also displayed markedly thinner myelin (increased g-ratios) relative to both control and *Dhh<sup>cre(+)</sup>;Fbxw7<sup>fl/+</sup>;mTOR<sup>+/+</sup>* siblings (k; 0-2 μm: Control to Het p<0.0001, Control to HetΔmTOR p=0.0364, Het to HetΔmTOR p<0.0001; 2-4 μm: Control to Het p<0.0001, Control to HetΔmTOR p<0.0001, Het to HetΔmTOR p<0.0001; 4-6 μm: Control to Het p<0.0001, Control to HetΔmTOR p<0.0001, Het to HetΔmTOR p<0.0001; 6+ μm: Control to Het p=0.0541, Control to HetΔmTOR p<0.0001, Het to HetΔmTOR p<0.0001; two way ANOVA). P3: N = 4 controls, N = 6 *Dhh<sup>cre(+)</sup>;Fbxw7<sup>fl/+</sup>;mTOR<sup>+/+</sup>*, N = 5 *Dhh<sup>cre(+)</sup>;Fbxw7<sup>fl/+</sup>;mTOR<sup>fl/fl</sup>*. For P21: N = 6 controls, N = 4 *Dhh<sup>cre(+)</sup>;Fbxw7<sup>fl/+</sup>;mTOR<sup>+/+</sup>*, and N = 3 *Dhh<sup>cre(+)</sup>;Fbxw7<sup>fl/+</sup>;mTOR<sup>fl/fl</sup>*. Error bars depict SD.
